# Supplementary material for: Hydrothermal synthesis of titanate nanotubes from TiO2 nanorods prepared via a molten salt flux method as an effective adsorbent for strontium ion recovery
Source: Royal Society of Chemistry journal article supplement (doi:10.1039/c6ra14769k), 2016-01-01
Supplement: c6ra14769k1.pdf [file c6ra14769k1.pdf]

## Electronic supplementary information

### **Hydrothermal Synthesis of Titanate Nanotubes from TiO<sub>2</sub> Nanorods Prepared via a Molten Salt Flux Method as an Effective Adsorbent for Strontium Ion Recovery**

Love Kumar Dhandole<sup>†a</sup>, Jungho Ryu<sup>†b</sup>, Jeong-Muk Lim<sup>a</sup>, Byung-Taek Oh<sup>a</sup>, Jung  
Hee Park<sup>a</sup>, Byoung-Gyu Kim<sup>\*b</sup> and Jum Suk Jang<sup>\*a</sup>

*<sup>a</sup>Division of Biotechnology, Advanced Institute of Environment and Bioscience, College of  
Environmental and Bioresource Sciences, Chonbuk National University, Iksan, 54596, Korea*

*<sup>b</sup>Mineral Resources Research Division, Korea Institute of Geoscience and Mineral  
Resources, Daejeon 34132, Korea.*

<sup>†</sup> Equal contribution

<sup>\*</sup>Corresponding author, Tel.: +82 63 850 0846; fax: +82 63 850 0834.

E-mail addresses: jangjs75@jbnu.ac.kr (J.S. Jang); kgbkim@kigam.re.kr (B.G. Kim).

**Table S1**

Particle size and powder yield of nanomaterials.

| <b>Samples</b>                                                                 | <b>Nanorod<br/>s</b> | <b>TNTs-<br/>1D</b> | <b>TNTs-<br/>2D</b> | <b>TNTs-<br/>3D</b> |
|--------------------------------------------------------------------------------|----------------------|---------------------|---------------------|---------------------|
| <b><sup>a</sup>Nano powder yield (in gm)</b>                                   | 0.920                | 0.506               | 0.560               | 0.610               |
| <b><sup>b</sup>External diameter (or width) of single<br/>particle (in nm)</b> | 160–300              | 20–35               | 16–25               | 30–60               |

<sup>a</sup> Nanopowder yield after washing and drying in an oven overnight (g).

<sup>b</sup> Nanomaterial external diameter or width of a particle, based on FESEM images (nm).

## Figure captions

**Fig. S1** Effect of the HT reaction time on the formation of nanotubes from nanorods (in 10 M NaOH at 160°C), FESEM images of (a) molten salt NRs, (b) 6 h and (c) 12 h samples; nanotubes formed on the surfaces of the NRs, (d) 24 h (1D); most NRs had transformed into nanotubes, (e) 48 h (2D); NRs completely disappeared, (f) 72 h (3D); nanotubes folded together due to a prolonged reaction, revealing solid, rod-like structures.

**Fig. S2** FE-SEM images of admixture nanoparticles (both untransformed NRs and TNTs) following the reaction over (a) 6 h, (b) 12 h, (c) 1D, (d) 2D, and (e) 3D at 160°C.

**Fig. S3** (A) BJH pore size distribution, and (B) nitrogen adsorption and desorption isotherms obtained from the TiO<sub>2</sub> nanorods.

**Fig. S4** Effect of mixed cations (Sr<sup>2+</sup>/ Ca<sup>2+</sup>) solution over strontium uptake by TNTs-2D. The varying Ca<sup>2+</sup> concentrations are (0, 100, 200, 300, 400 mg L<sup>-1</sup>) and fixed Sr<sup>2+</sup> (10 mg L<sup>-1</sup>) with 30 min contact time. Inset image: Equimolar Sr (mmol/g) and Ca (mmol/g) adsorption curve for TNT-2D nanomaterial adsorbents in seawater.

**Fig. S5** Effect of calcination on the TNT-2D adsorbents over time, and Sr<sup>2+</sup> adsorption as a function of the Sr<sup>2+</sup> concentration.

**Fig. S6** Comparison of the k<sup>2</sup>-weighted Fourier transform of the theoretical scattering patterns from the Ti-Na and Ti-Sr<sup>2+</sup> interactions in the titanate structure.

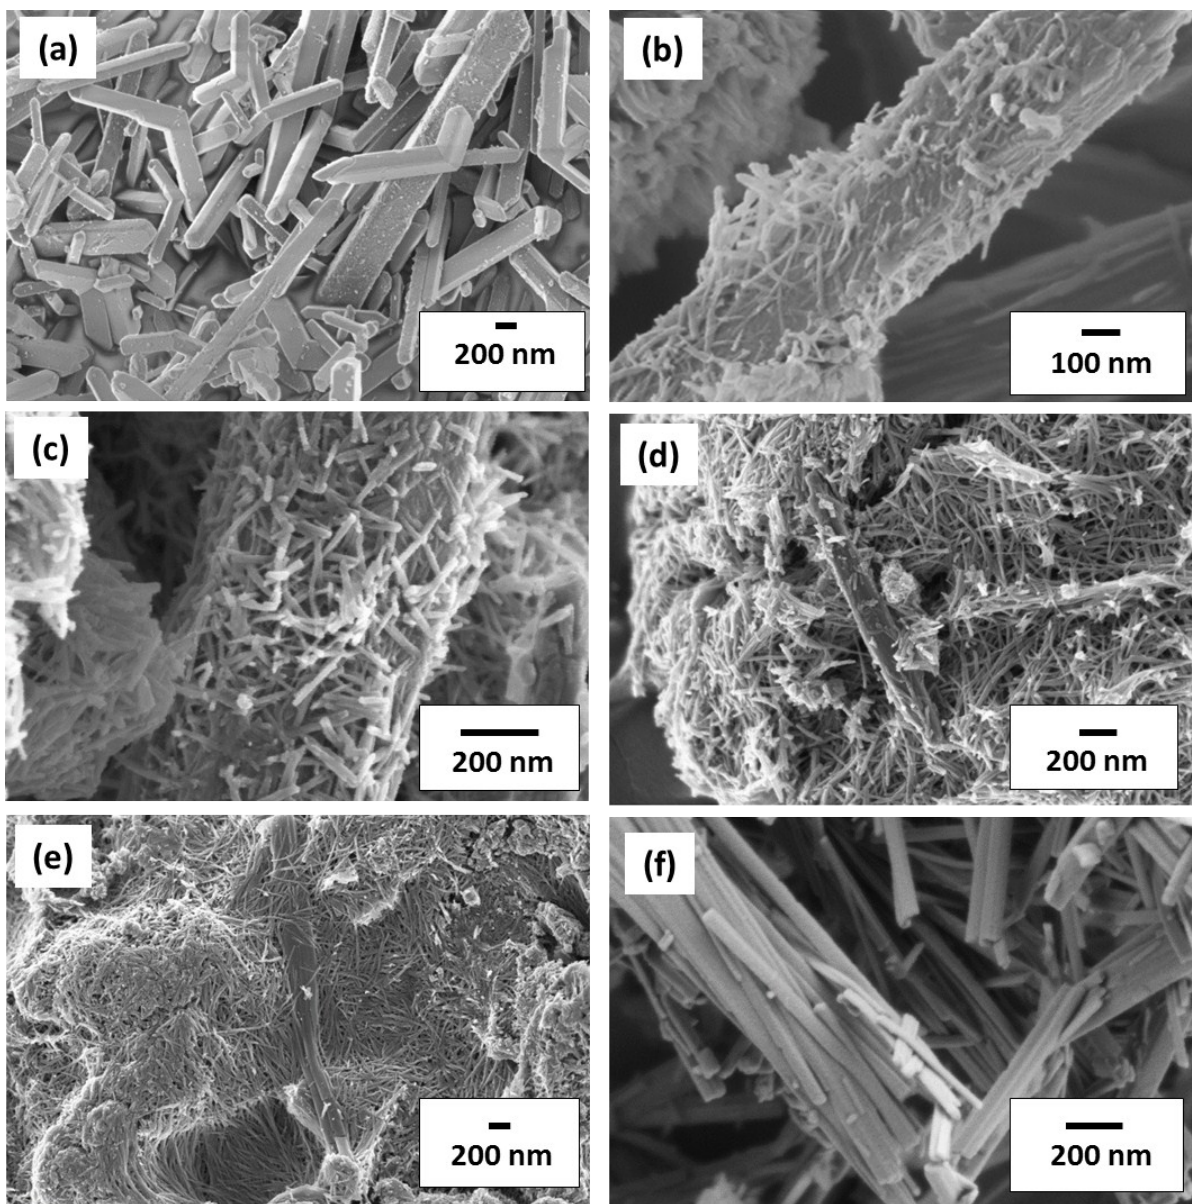

Fig. S1

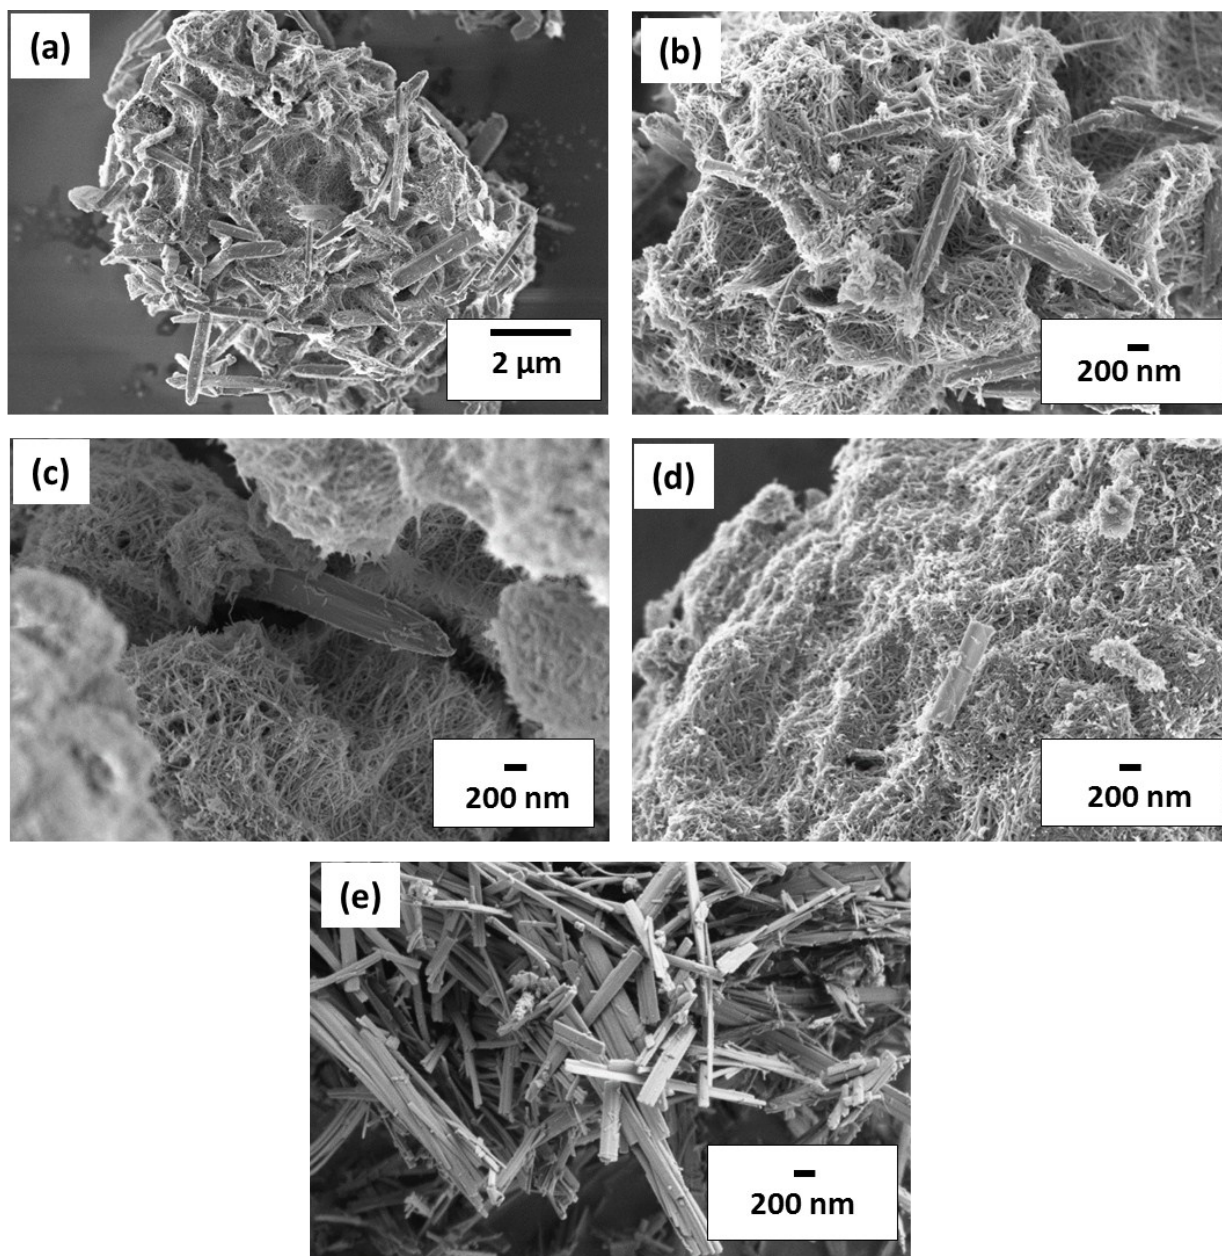

Fig. S2

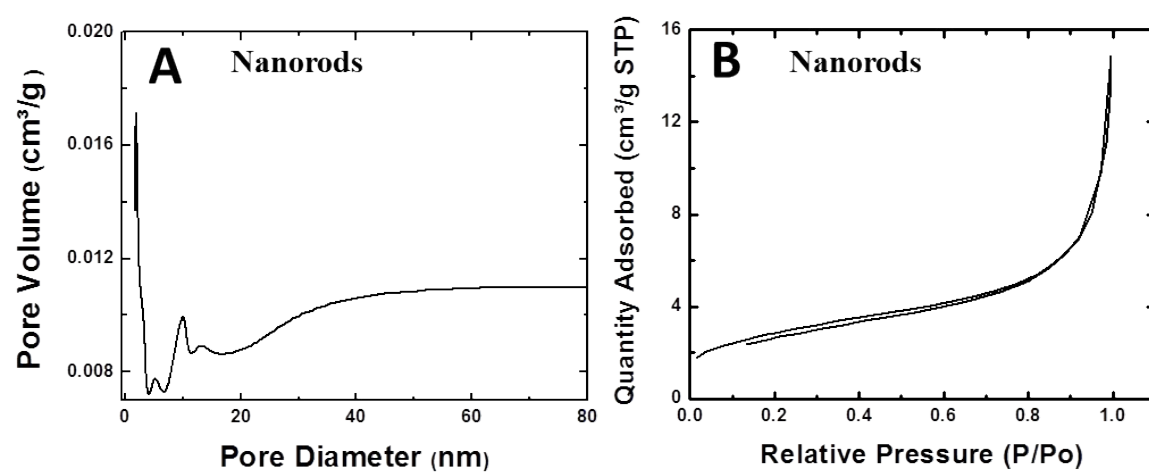

Fig. S3

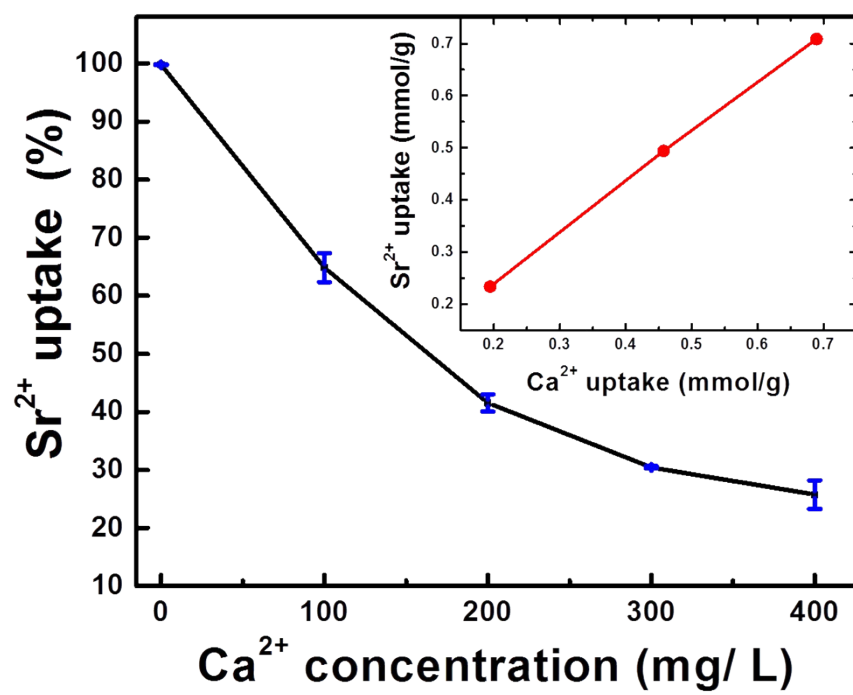

Fig. S4

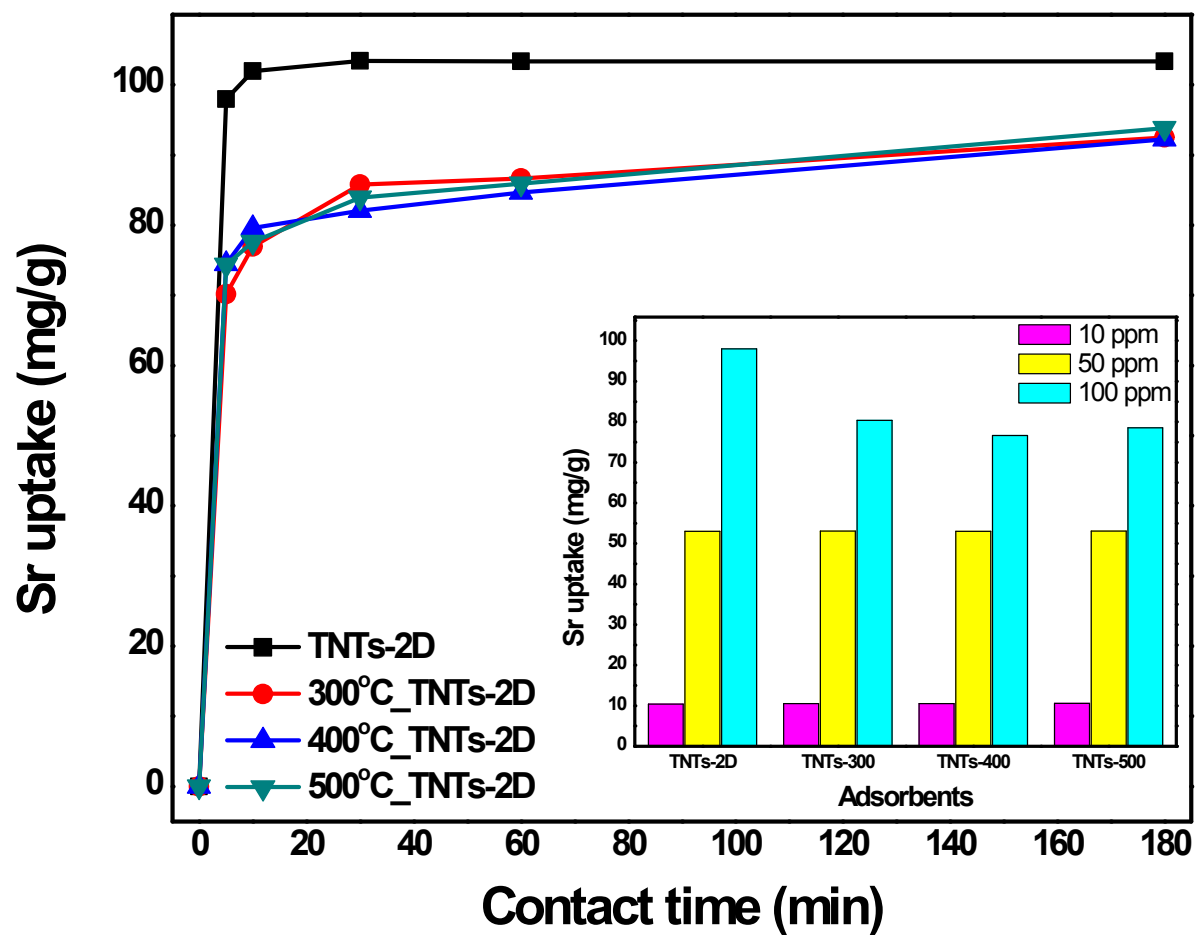

Fig. S5

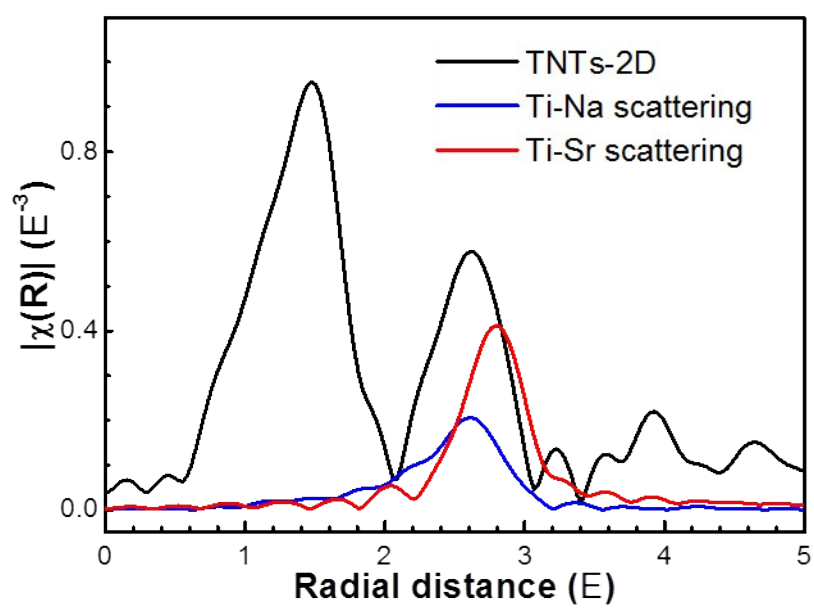

**Fig. S6**
